# Supplementary material for: Computational development of rubromycin-based lead compounds for HIV-1 reverse transcriptase inhibition
Source: PeerJ. 2014 Jul 10;2:e470. doi: 10.7717/peerj.470 (PMC4103094; doi:10.7717/peerj.470)
Supplement: Supplemental Information 5 — Diagnostic distances (K154-N255 and D67-Q242) in the last 15 ns of the simulation of wild-type reverse-transcriptase bound to gamma-rubromycin. Distances observed in the catalytically active conformation are shown in the graph as dotted lines. [file peerj-02-470-s005.xls]

## Sheet: MD_0_WT_open_v_extended
	D67 Q242	N 255 K 154			D67 Q242	N 255 K 154
15000	25.154	32.426			25.366	28.026
15250	25.969	34.995			25.366	28.026
15500	25.929	33.525			25.366	28.026
15750	28.466	31.846			25.366	28.026
16000	25.502	32.216			25.366	28.026
16250	27.962	34.41			25.366	28.026
16500	30.507	34.275			25.366	28.026
16750	28.731	31.469			25.366	28.026
17000	26.817	30.754			25.366	28.026
17250	24.21	34.523			25.366	28.026
17500	28.985	33.525			25.366	28.026
17750	29.258	34.032			25.366	28.026
18000	23.687	31.205			25.366	28.026
18250	26.448	33.34			25.366	28.026
18500	31.051	32.767			25.366	28.026
18750	26.013	32.767			25.366	28.026
19000	24.353	30.428			25.366	28.026
19250	27.466	28.762			25.366	28.026
19500	31.24	33.002			25.366	28.026
19750	27.392	35.732			25.366	28.026
20000	23.3	33.44			25.366	28.026
20250	23.197	34.251			25.366	28.026
20500	22.8	33.901			25.366	28.026
20750	25.769	35.166			25.366	28.026
21000	27.851	31.295			25.366	28.026
21250	26.379	33.805			25.366	28.026
21500	23.88	32.155			25.366	28.026
21750	22.891	28.855			25.366	28.026
22000	23.873	34.239			25.366	28.026
22250	23.437	31.336			25.366	28.026
22500	26.849	34.28			25.366	28.026
22750	23.964	34.585			25.366	28.026
23000	25.586	34.816			25.366	28.026
23250	25.545	32.668			25.366	28.026
23500	23.691	36.386			25.366	28.026
23750	27.168	30.8			25.366	28.026
24000	26.15	31.435			25.366	28.026
24250	27.764	31.865			25.366	28.026
24500	25.697	31.223			25.366	28.026
24750	23.605	28.637			25.366	28.026
25000	25.952	31.622			25.366	28.026
25250	25.724	32.387			25.366	28.026
25500	25.456	32.885			25.366	28.026
25750	28.466	33.801			25.366	28.026
26000	28.474	33.78			25.366	28.026
26250	26.215	35.013			25.366	28.026
26500	30.944	34.962			25.366	28.026
26750	27.145	33.144			25.366	28.026
27000	27.412	34.2			25.366	28.026
27250	27.352	35.307			25.366	28.026
27500	28.226	35.596			25.366	28.026
27750	26.273	34.41			25.366	28.026
28000	24.297	32.738			25.366	28.026
28250	25.096	33.467			25.366	28.026
28500	25.427	32.719			25.366	28.026
28750	26.979	31.531			25.366	28.026
29000	28.479	33.101			25.366	28.026
29250	28.433	34.75			25.366	28.026
29500	27.996	33.388			25.366	28.026
29750	30.407	33.764			25.366	28.026
