# Supplementary material for: Computational development of rubromycin-based lead compounds for HIV-1 reverse transcriptase inhibition
Source: PeerJ. 2014 Jul 10;2:e470. doi: 10.7717/peerj.470 (PMC4103094; doi:10.7717/peerj.470)
Supplement: Supplemental Information 6 — Diagnostic distances (K154-N255 and D67-Q242) in the last 15 ns of the simulation of wild-type reverse-transcriptase bound to rilpivirine. Distances observed in the catalytically active conformation are shown in the graph as dotted lines. [file peerj-02-470-s006.xls]

## Sheet: MD_0_WT_open_v_extended
					D67 Q242	N 255 K 154
15000	26.963	32.062			25.366	28.026
15250	29.675	31.655			25.366	28.026
15500	30.336	34.691			25.366	28.026
15750	27.388	30.832			25.366	28.026
16000	31.658	32.963			25.366	28.026
16250	31.386	32.721			25.366	28.026
16500	31.537	32.354			25.366	28.026
16750	31.911	31.762			25.366	28.026
17000	29.275	33.987			25.366	28.026
17250	35.718	31.307			25.366	28.026
17500	35.754	31.836			25.366	28.026
17750	34.441	32.487			25.366	28.026
18000	30.688	34.487			25.366	28.026
18250	32.814	32.023			25.366	28.026
18500	31.115	31.247			25.366	28.026
18750	31.945	33.737			25.366	28.026
19000	29.533	30.348			25.366	28.026
19250	28.601	30.456			25.366	28.026
19500	31.246	30.997			25.366	28.026
19750	32.412	31.352			25.366	28.026
20000	28.537	27.626			25.366	28.026
20250	29.582	32.534			25.366	28.026
20500	28.848	30.417			25.366	28.026
20750	27.958	31.667			25.366	28.026
21000	30.356	33.548			25.366	28.026
21250	29.345	30.928			25.366	28.026
21500	25.265	30.285			25.366	28.026
21750	25.804	28.129			25.366	28.026
22000	27.389	29.955			25.366	28.026
22250	25.254	31.87			25.366	28.026
22500	27.994	32.626			25.366	28.026
22750	28.266	31.474			25.366	28.026
23000	28.141	31.996			25.366	28.026
23250	25.913	31.785			25.366	28.026
23500	27.04	33.815			25.366	28.026
23750	29.358	31.027			25.366	28.026
24000	30.7	31.054			25.366	28.026
24250	25.153	30.596			25.366	28.026
24500	27.233	32.959			25.366	28.026
24750	31.747	30.662			25.366	28.026
25000	32.5	31.607			25.366	28.026
25250	29.236	32.068			25.366	28.026
25500	30.44	31.142			25.366	28.026
25750	29.602	33.69			25.366	28.026
26000	30.619	32.613			25.366	28.026
26250	31.298	32.237			25.366	28.026
26500	31.912	32.875			25.366	28.026
26750	32.266	31.413			25.366	28.026
27000	34.21	29.828			25.366	28.026
27250	34.464	28.766			25.366	28.026
27500	30.423	30.59			25.366	28.026
27750	28.412	32.715			25.366	28.026
28000	28.379	31.288			25.366	28.026
28250	29.079	30.595			25.366	28.026
28500	28.739	31.128			25.366	28.026
28750	27.465	32.032			25.366	28.026
29000	24.862	31.97			25.366	28.026
29250	29.121	31.65			25.366	28.026
29500	30.587	33.022			25.366	28.026
29750	31.897	31.864			25.366	28.026
