# Supplementary material for: Computational development of rubromycin-based lead compounds for HIV-1 reverse transcriptase inhibition
Source: PeerJ. 2014 Jul 10;2:e470. doi: 10.7717/peerj.470 (PMC4103094; doi:10.7717/peerj.470)
Supplement: Supplemental Information 7 — Diagnostic distances (K154-N255 and D67-Q242) in the last 15 ns of the simulation of wild-type reverse-transcriptase bound to ligand 13. Distances observed in the catalytically active conformation are shown in the graph as dotted lines. [file peerj-02-470-s007.xls]

## Sheet: MD_0_WT_open_v_extended
					D67 Q242	N 255 K 154
15000	35.011	31.215			25.366	28.026
15250	39.145	31.954			25.366	28.026
15500	36.029	31.367			25.366	28.026
15750	32.891	31.959			25.366	28.026
16000	36.242	34.607			25.366	28.026
16250	35.974	32.646			25.366	28.026
16500	32.038	30.004			25.366	28.026
16750	28.672	30.416			25.366	28.026
17000	32.558	33.155			25.366	28.026
17250	35.824	30.934			25.366	28.026
17500	31.467	32.532			25.366	28.026
17750	25.505	31.239			25.366	28.026
18000	23.19	33.204			25.366	28.026
18250	23.763	31.097			25.366	28.026
18500	24.813	32.266			25.366	28.026
18750	24.444	30.889			25.366	28.026
19000	27.038	31.711			25.366	28.026
19250	24.71	29.501			25.366	28.026
19500	23.906	31.234			25.366	28.026
19750	25.1	29.02			25.366	28.026
20000	25.147	28.358			25.366	28.026
20250	25.52	31.765			25.366	28.026
20500	24.883	31.315			25.366	28.026
20750	25.552	32.299			25.366	28.026
21000	28.546	32.938			25.366	28.026
21250	27.71	32.637			25.366	28.026
21500	25.12	30.401			25.366	28.026
21750	23.885	30.841			25.366	28.026
22000	28.492	30.555			25.366	28.026
22250	30.75	31.344			25.366	28.026
22500	32.387	30.157			25.366	28.026
22750	28.097	30.397			25.366	28.026
23000	26.892	30.607			25.366	28.026
23250	31.439	31.122			25.366	28.026
23500	29.467	30.343			25.366	28.026
23750	29.474	30.193			25.366	28.026
24000	29.224	30.19			25.366	28.026
24250	27.19	32.65			25.366	28.026
24500	30.096	31.398			25.366	28.026
24750	31.307	31.323			25.366	28.026
25000	30.701	31.339			25.366	28.026
25250	29.742	31.806			25.366	28.026
25500	29.137	30.119			25.366	28.026
25750	25.809	31.704			25.366	28.026
26000	30.375	31.112			25.366	28.026
26250	28.292	32.793			25.366	28.026
26500	29.071	33.056			25.366	28.026
26750	24.59	32.031			25.366	28.026
27000	25.88	32.765			25.366	28.026
27250	28.863	33.306			25.366	28.026
27500	25.29	31.8			25.366	28.026
27750	23.982	31.171			25.366	28.026
28000	22.812	31.484			25.366	28.026
28250	27.087	34.935			25.366	28.026
28500	25.333	33.21			25.366	28.026
28750	28.782	31.94			25.366	28.026
29000	26.139	32.485			25.366	28.026
29250	26.231	31.623			25.366	28.026
29500	25.38	32.626			25.366	28.026
29750	27.631	33.886			25.366	28.026
