# Supplementary material for: Computational development of rubromycin-based lead compounds for HIV-1 reverse transcriptase inhibition
Source: PeerJ. 2014 Jul 10;2:e470. doi: 10.7717/peerj.470 (PMC4103094; doi:10.7717/peerj.470)
Supplement: Supplemental Information 13 — Diagnostic distances (K154-N255 and D67-Q242) in the last 15 ns of the simulation of wild-type reverse-transcriptase bound to ligand 38. Distances observed in the catalytically active conformation are shown in the graph as dotted lines. [file peerj-02-470-s013.xls]

## Sheet: MD_0_WT_open_v_extended
					D67 Q242	N 255 K 154
15000	37.886	34.262			25.366	28.026
15250	38.369	35.928			25.366	28.026
15500	41.558	34.296			25.366	28.026
15750	42.772	36.411			25.366	28.026
16000	45.796	35.695			25.366	28.026
16250	42.401	34.867			25.366	28.026
16500	43.896	33.134			25.366	28.026
16750	42.374	34.199			25.366	28.026
17000	44.796	32.114			25.366	28.026
17250	44.102	33.345			25.366	28.026
17500	43.397	35.788			25.366	28.026
17750	42.339	37.259			25.366	28.026
18000	39.831	34.898			25.366	28.026
18250	40.369	35.973			25.366	28.026
18500	41.097	33.867			25.366	28.026
18750	41.549	31.931			25.366	28.026
19000	39.895	36.352			25.366	28.026
19250	38.871	30.929			25.366	28.026
19500	40.512	32.541			25.366	28.026
19750	42.376	34.231			25.366	28.026
20000	41.548	31.687			25.366	28.026
20250	44.375	32.377			25.366	28.026
20500	41.393	31.502			25.366	28.026
20750	40.106	33.064			25.366	28.026
21000	44.465	33.132			25.366	28.026
21250	44.981	32.089			25.366	28.026
21500	41.099	30.705			25.366	28.026
21750	41.51	29.094			25.366	28.026
22000	40.562	33.426			25.366	28.026
22250	43.646	32.008			25.366	28.026
22500	39.172	31.37			25.366	28.026
22750	41.825	35.084			25.366	28.026
23000	38.768	32.379			25.366	28.026
23250	44.19	33.144			25.366	28.026
23500	43.26	35.603			25.366	28.026
23750	41.896	35.75			25.366	28.026
24000	39.941	32.03			25.366	28.026
24250	38.323	31.891			25.366	28.026
24500	36.63	32.747			25.366	28.026
24750	41.149	32.932			25.366	28.026
25000	39.22	33.467			25.366	28.026
25250	40.105	31.125			25.366	28.026
25500	38.449	30.848			25.366	28.026
25750	42.466	33.375			25.366	28.026
26000	44.124	31.952			25.366	28.026
26250	42.208	35.594			25.366	28.026
26500	38.51	31.545			25.366	28.026
26750	39.562	31.454			25.366	28.026
27000	38.859	31.648			25.366	28.026
27250	37.794	32.477			25.366	28.026
27500	36.527	33.651			25.366	28.026
27750	39.005	32.991			25.366	28.026
28000	38.218	33.285			25.366	28.026
28250	37.833	33.349			25.366	28.026
28500	43.254	33.858			25.366	28.026
28750	39.389	31.18			25.366	28.026
29000	39.766	31.025			25.366	28.026
29250	42.143	31.1			25.366	28.026
29500	42.816	31.918			25.366	28.026
29750	40.729	31.904			25.366	28.026
