# Supplementary material for: Computational development of rubromycin-based lead compounds for HIV-1 reverse transcriptase inhibition
Source: PeerJ. 2014 Jul 10;2:e470. doi: 10.7717/peerj.470 (PMC4103094; doi:10.7717/peerj.470)
Supplement: Supplemental Information 14 — Diagnostic distances (K154-N255 and D67-Q242) in the last 15 ns of the simulation of wild-type reverse-transcriptase bound to ligand 45. Distances observed in the catalytically active conformation are shown in the graph as dotted lines. [file peerj-02-470-s014.xls]

## Sheet: MD_0_WT_open_v_extended
					D67 Q242	N 255 K 154
15000	32.895	33.521			25.366	28.026
15250	32.964	34.591			25.366	28.026
15500	36.045	31.659			25.366	28.026
15750	34.528	30.986			25.366	28.026
16000	35.735	33.091			25.366	28.026
16250	32.719	32.565			25.366	28.026
16500	35.886	36.411			25.366	28.026
16750	37.92	34.639			25.366	28.026
17000	34.167	34.153			25.366	28.026
17250	32.764	33.319			25.366	28.026
17500	31.538	33.518			25.366	28.026
17750	31.008	31.132			25.366	28.026
18000	31.99	30.903			25.366	28.026
18250	32.082	34.29			25.366	28.026
18500	32.324	35.675			25.366	28.026
18750	31.42	31.862			25.366	28.026
19000	32.404	34.117			25.366	28.026
19250	37.798	31.644			25.366	28.026
19500	34.215	31.908			25.366	28.026
19750	35.689	33.435			25.366	28.026
20000	35.931	32.728			25.366	28.026
20250	36	32.728			25.366	28.026
20500	31.258	34.141			25.366	28.026
20750	31.476	33.475			25.366	28.026
21000	34.467	36.257			25.366	28.026
21250	32.496	34.293			25.366	28.026
21500	32.445	32.516			25.366	28.026
21750	37.55	32.998			25.366	28.026
22000	33.347	32.715			25.366	28.026
22250	35.755	32.654			25.366	28.026
22500	29.748	33.377			25.366	28.026
22750	29.707	34.63			25.366	28.026
23000	36.249	33.068			25.366	28.026
23250	33.03	32.742			25.366	28.026
23500	30.364	32.271			25.366	28.026
23750	33.746	29.793			25.366	28.026
24000	32.503	33.802			25.366	28.026
24250	35.564	32.305			25.366	28.026
24500	35.621	34.167			25.366	28.026
24750	35.253	32.574			25.366	28.026
25000	35.894	30.541			25.366	28.026
25250	35.936	32.029			25.366	28.026
25500	33.344	31.859			25.366	28.026
25750	38.632	31.653			25.366	28.026
26000	39.408	31.211			25.366	28.026
26250	39.454	34.056			25.366	28.026
26500	39.848	34.648			25.366	28.026
26750	38.944	32.981			25.366	28.026
27000	39.139	34.182			25.366	28.026
27250	40.63	33.249			25.366	28.026
27500	36.258	32.092			25.366	28.026
27750	35.458	30.388			25.366	28.026
28000	37.356	30.88			25.366	28.026
28250	34.836	30.918			25.366	28.026
28500	36.291	33.07			25.366	28.026
28750	29.394	30.293			25.366	28.026
29000	29.003	30.946			25.366	28.026
29250	31.505	33.052			25.366	28.026
29500	31.678	33.337			25.366	28.026
29750	31.043	35.267			25.366	28.026
