# Supplementary material for: Computational development of rubromycin-based lead compounds for HIV-1 reverse transcriptase inhibition
Source: PeerJ. 2014 Jul 10;2:e470. doi: 10.7717/peerj.470 (PMC4103094; doi:10.7717/peerj.470)
Supplement: Supplemental Information 15 — Diagnostic distances (K154-N255 and D67-Q242) in the last 15 ns of the simulation of wild-type reverse-transcriptase bound to ligand 46. Distances observed in the catalytically active conformation are shown in the graph as dotted lines. [file peerj-02-470-s015.xls]

## Sheet: MD_0_WT_open_v_extended
					D67 Q242	N 255 K 154
15000	30.383	29.538			25.366	28.026
15250	32.587	29.421			25.366	28.026
15500	31.049	29.119			25.366	28.026
15750	31.994	28.888			25.366	28.026
16000	32.92	30.885			25.366	28.026
16250	32.581	30.933			25.366	28.026
16500	31.432	30.72			25.366	28.026
16750	32.892	28.683			25.366	28.026
17000	30.684	32.447			25.366	28.026
17250	33.148	31.078			25.366	28.026
17500	34.959	30.088			25.366	28.026
17750	32.68	30.321			25.366	28.026
18000	30.439	30.143			25.366	28.026
18250	32.218	32.494			25.366	28.026
18500	35.866	27.007			25.366	28.026
18750	32.639	26.861			25.366	28.026
19000	30.682	29.796			25.366	28.026
19250	36.118	29.964			25.366	28.026
19500	32.653	28.947			25.366	28.026
19750	34.948	26.258			25.366	28.026
20000	37.107	30.241			25.366	28.026
20250	29.834	29.286			25.366	28.026
20500	34.212	29.532			25.366	28.026
20750	31.518	28.314			25.366	28.026
21000	28.011	28.015			25.366	28.026
21250	29.254	29.181			25.366	28.026
21500	28.514	30.935			25.366	28.026
21750	29.451	31.045			25.366	28.026
22000	31.569	28.545			25.366	28.026
22250	32.852	27.233			25.366	28.026
22500	31.318	30.758			25.366	28.026
22750	33.581	30.121			25.366	28.026
23000	30.998	30.598			25.366	28.026
23250	29.24	31.956			25.366	28.026
23500	28.455	30.566			25.366	28.026
23750	28.599	33.853			25.366	28.026
24000	32.286	32.319			25.366	28.026
24250	32.824	34.214			25.366	28.026
24500	29.663	31.395			25.366	28.026
24750	30.349	31.751			25.366	28.026
25000	28.923	30.787			25.366	28.026
25250	30.378	33.9			25.366	28.026
25500	34.801	32.083			25.366	28.026
25750	30.328	33.662			25.366	28.026
26000	26.829	31.733			25.366	28.026
26250	33.518	31.492			25.366	28.026
26500	31.876	30.247			25.366	28.026
26750	26.267	32.493			25.366	28.026
27000	33.758	30.39			25.366	28.026
27250	32.091	32.052			25.366	28.026
27500	29.797	31.038			25.366	28.026
27750	26.007	30.91			25.366	28.026
28000	31.055	30.595			25.366	28.026
28250	31.124	32.119			25.366	28.026
28500	29.052	31.925			25.366	28.026
28750	30.643	29.968			25.366	28.026
29000	31.454	31.076			25.366	28.026
29250	32.194	31.99			25.366	28.026
29500	28.644	31.512			25.366	28.026
29750	32.747	31.163			25.366	28.026
