# Supplementary material for: Computational development of rubromycin-based lead compounds for HIV-1 reverse transcriptase inhibition
Source: PeerJ. 2014 Jul 10;2:e470. doi: 10.7717/peerj.470 (PMC4103094; doi:10.7717/peerj.470)
Supplement: Supplemental Information 17 [file peerj-02-470-s017.xls]

## Sheet: MD_0_WT_open_v_extended
					D67 Q242	N 255 K 154
15000	35.311	32.665			25.366	28.026
15250	31.05	29.464			25.366	28.026
15500	29.049	28.714			25.366	28.026
15750	28.393	32.38			25.366	28.026
16000	26.671	31.42			25.366	28.026
16250	29.174	30.718			25.366	28.026
16500	36.686	31.06			25.366	28.026
16750	33.56	32.297			25.366	28.026
17000	38.112	34.128			25.366	28.026
17250	39.15	33.407			25.366	28.026
17500	39.933	33.361			25.366	28.026
17750	39.878	34.528			25.366	28.026
18000	38.435	35.423			25.366	28.026
18250	36.66	33.829			25.366	28.026
18500	33.733	33.149			25.366	28.026
18750	35.718	34.492			25.366	28.026
19000	37.188	33.596			25.366	28.026
19250	36.541	32.861			25.366	28.026
19500	36.793	33.195			25.366	28.026
19750	37.39	34.27			25.366	28.026
20000	38.164	32.808			25.366	28.026
20250	39.345	33.25			25.366	28.026
20500	35.659	33.075			25.366	28.026
20750	36.125	32.68			25.366	28.026
21000	31.716	33.564			25.366	28.026
21250	33.831	34.157			25.366	28.026
21500	31.088	33.542			25.366	28.026
21750	28.869	33.512			25.366	28.026
22000	32.521	34.294			25.366	28.026
22250	39.783	36.165			25.366	28.026
22500	33.838	34.039			25.366	28.026
22750	35.658	34.118			25.366	28.026
23000	35.861	32.698			25.366	28.026
23250	38.604	31.671			25.366	28.026
23500	37.74	32.705			25.366	28.026
23750	36.262	32.124			25.366	28.026
24000	34.677	33.193			25.366	28.026
24250	35.781	32.278			25.366	28.026
24500	31.491	30.354			25.366	28.026
24750	33.236	30.546			25.366	28.026
25000	33.576	27.466			25.366	28.026
25250	30.596	31.698			25.366	28.026
25500	35.411	28.926			25.366	28.026
25750	36.12	29.896			25.366	28.026
26000	34.577	31.471			25.366	28.026
26250	34.744	32.6			25.366	28.026
26500	32.594	29.919			25.366	28.026
26750	30.872	29.077			25.366	28.026
27000	34.287	29.919			25.366	28.026
27250	28.171	28.283			25.366	28.026
27500	31.809	28.588			25.366	28.026
27750	27.9	30.151			25.366	28.026
28000	30.837	27.904			25.366	28.026
28250	37.384	28.986			25.366	28.026
28500	35.226	28.906			25.366	28.026
28750	36.525	31.742			25.366	28.026
29000	33.333	30.375			25.366	28.026
29250	35.853	31.587			25.366	28.026
29500	38.618	30.686			25.366	28.026
29750	38.467	29.596			25.366	28.026
30000	37.298	29.744
