# Supplementary material for: Computational development of rubromycin-based lead compounds for HIV-1 reverse transcriptase inhibition
Source: PeerJ. 2014 Jul 10;2:e470. doi: 10.7717/peerj.470 (PMC4103094; doi:10.7717/peerj.470)
Supplement: Supplemental Information 19 [file peerj-02-470-s019.xls]

## Sheet: MD_0_WT_open_v_extended
					D67 Q242	N 255 K 154
15000	27.189	30.914			25.366	28.026
15250	24.501	28.47			25.366	28.026
15500	24.145	30.341			25.366	28.026
15750	28.129	29.468			25.366	28.026
16000	25.268	31.213			25.366	28.026
16250	29.568	31.92			25.366	28.026
16500	30.182	30.112			25.366	28.026
16750	25.427	30.925			25.366	28.026
17000	27.409	31.628			25.366	28.026
17250	29.071	29.089			25.366	28.026
17500	29.997	28.965			25.366	28.026
17750	31.641	29.397			25.366	28.026
18000	32.922	30.461			25.366	28.026
18250	29.636	31.283			25.366	28.026
18500	29.028	29.097			25.366	28.026
18750	33.417	32.028			25.366	28.026
19000	31.217	33.591			25.366	28.026
19250	27.971	31.054			25.366	28.026
19500	30.514	32.582			25.366	28.026
19750	26.442	33.07			25.366	28.026
20000	27.028	30.745			25.366	28.026
20250	28.233	29.567			25.366	28.026
20500	25.118	31.232			25.366	28.026
20750	28.55	32.506			25.366	28.026
21000	26.442	32.721			25.366	28.026
21250	29.611	32.893			25.366	28.026
21500	28.638	30.737			25.366	28.026
21750	25.064	31.336			25.366	28.026
22000	30.585	31.283			25.366	28.026
22250	29.956	31.597			25.366	28.026
22500	32.561	30.956			25.366	28.026
22750	30.245	31.667			25.366	28.026
23000	28.45	30.185			25.366	28.026
23250	28.05	29.999			25.366	28.026
23500	28.362	32.648			25.366	28.026
23750	30.043	32.893			25.366	28.026
24000	29.383	31.568			25.366	28.026
24250	29.628	31.213			25.366	28.026
24500	28.088	29.162			25.366	28.026
24750	27.786	31.375			25.366	28.026
25000	29.472	28.548			25.366	28.026
25250	27.496	30.913			25.366	28.026
25500	23.365	28.62			25.366	28.026
25750	26.793	28.969			25.366	28.026
26000	29.513	29.783			25.366	28.026
26250	28.456	30.346			25.366	28.026
26500	26.08	31.532			25.366	28.026
26750	24.197	29.559			25.366	28.026
27000	25.41	32.198			25.366	28.026
27250	27.45	30.337			25.366	28.026
27500	28.123	29.442			25.366	28.026
27750	28.101	32.313			25.366	28.026
28000	29.749	30.747			25.366	28.026
28250	29.831	29.55			25.366	28.026
28500	31.743	31.582			25.366	28.026
28750	28.956	30.491			25.366	28.026
29000	35.857	30.864			25.366	28.026
29250	29.916	31.178			25.366	28.026
29500	33.902	31.627			25.366	28.026
29750	30.428	31.832			25.366	28.026
30000	32.546	32.19
