# Supplementary material for: Computational development of rubromycin-based lead compounds for HIV-1 reverse transcriptase inhibition
Source: PeerJ. 2014 Jul 10;2:e470. doi: 10.7717/peerj.470 (PMC4103094; doi:10.7717/peerj.470)
Supplement: Supplemental Information 25 [file peerj-02-470-s025.xls]

## Sheet: MD_0_WT_open_v_extended
					D67 Q242	N 255 K 154
15000	27.572	30.559			25.366	28.026
15250	29.078	28.911			25.366	28.026
15500	27.407	29.27			25.366	28.026
15750	32.241	31.618			25.366	28.026
16000	30.116	30.846			25.366	28.026
16250	30.96	32.514			25.366	28.026
16500	30.02	30.714			25.366	28.026
16750	33.426	29.593			25.366	28.026
17000	30.832	31.841			25.366	28.026
17250	31.747	28.822			25.366	28.026
17500	30.015	28.421			25.366	28.026
17750	31.408	29.695			25.366	28.026
18000	33.244	34.71			25.366	28.026
18250	34.544	33.85			25.366	28.026
18500	29.846	31.652			25.366	28.026
18750	32.543	30.906			25.366	28.026
19000	32.294	31.489			25.366	28.026
19250	31.028	28.287			25.366	28.026
19500	29.128	31.51			25.366	28.026
19750	27.083	31.221			25.366	28.026
20000	28.775	29.297			25.366	28.026
20250	30.503	27.494			25.366	28.026
20500	30.351	28.26			25.366	28.026
20750	30.68	29.505			25.366	28.026
21000	30.37	28.269			25.366	28.026
21250	31.011	29.313			25.366	28.026
21500	31.538	29.655			25.366	28.026
21750	30.888	28.291			25.366	28.026
22000	30.344	30.792			25.366	28.026
22250	26.751	25.659			25.366	28.026
22500	31.118	25.064			25.366	28.026
22750	30.815	28.055			25.366	28.026
23000	29.623	28.494			25.366	28.026
23250	27.623	31.468			25.366	28.026
23500	30.172	29.741			25.366	28.026
23750	32.498	29.792			25.366	28.026
24000	31.999	30.126			25.366	28.026
24250	28.309	28.28			25.366	28.026
24500	29.023	26.1			25.366	28.026
24750	25.532	26.877			25.366	28.026
25000	23.696	28.348			25.366	28.026
25250	27.605	27.968			25.366	28.026
25500	32.737	28.346			25.366	28.026
25750	29.449	31.83			25.366	28.026
26000	28.351	28.211			25.366	28.026
26250	29.918	29.976			25.366	28.026
26500	29.139	31.805			25.366	28.026
26750	27.839	29.955			25.366	28.026
27000	31.103	26.57			25.366	28.026
27250	29.615	26.545			25.366	28.026
27500	29.649	29.369			25.366	28.026
27750	30.162	29.129			25.366	28.026
28000	32.572	30.341			25.366	28.026
28250	31.86	28.675			25.366	28.026
28500	32.439	28.76			25.366	28.026
28750	30.722	27.99			25.366	28.026
29000	32.322	30.009			25.366	28.026
29250	34.418	26.445			25.366	28.026
29500	33.956	28.053			25.366	28.026
29750	33.96	30.615			25.366	28.026
