# Supplementary material for: Computational development of rubromycin-based lead compounds for HIV-1 reverse transcriptase inhibition
Source: PeerJ. 2014 Jul 10;2:e470. doi: 10.7717/peerj.470 (PMC4103094; doi:10.7717/peerj.470)
Supplement: Supplemental Information 27 [file peerj-02-470-s027.xls]

## Sheet: MD_0_WT_open_v_extended
					D67 Q242	N 255 K 154
15000	30.19	35.004			25.366	28.026
15250	28.107	38.108			25.366	28.026
15500	26.855	35.254			25.366	28.026
15750	28.2	35.586			25.366	28.026
16000	28.842	33.887			25.366	28.026
16250	29.655	37.424			25.366	28.026
16500	26.643	34.879			25.366	28.026
16750	27.474	35.33			25.366	28.026
17000	28.875	36.421			25.366	28.026
17250	29.192	35.822			25.366	28.026
17500	28.87	33.869			25.366	28.026
17750	28.207	34.856			25.366	28.026
18000	26.172	31.531			25.366	28.026
18250	31.514	34.572			25.366	28.026
18500	29.576	36.48			25.366	28.026
18750	29.665	33.504			25.366	28.026
19000	30.989	32.99			25.366	28.026
19250	28.071	34.73			25.366	28.026
19500	28.784	33.643			25.366	28.026
19750	28.56	31.537			25.366	28.026
20000	25.475	31.907			25.366	28.026
20250	26.091	35.794			25.366	28.026
20500	27.114	34.171			25.366	28.026
20750	32.644	33.311			25.366	28.026
21000	26.691	32.272			25.366	28.026
21250	24.466	30.891			25.366	28.026
21500	30.768	32.898			25.366	28.026
21750	30.568	32.217			25.366	28.026
22000	28.524	30.243			25.366	28.026
22250	29.776	32.994			25.366	28.026
22500	28.751	34.955			25.366	28.026
22750	29.086	35.22			25.366	28.026
23000	27.266	34.04			25.366	28.026
23250	30.531	35.068			25.366	28.026
23500	32.244	35.297			25.366	28.026
23750	34.207	33.858			25.366	28.026
24000	29.391	32.935			25.366	28.026
24250	30.383	31.488			25.366	28.026
24500	26.78	31.902			25.366	28.026
24750	31.117	31.761			25.366	28.026
25000	30.835	31.46			25.366	28.026
25250	33.071	31.777			25.366	28.026
25500	33.125	31.961			25.366	28.026
25750	27.823	30.437			25.366	28.026
26000	28.681	31.506			25.366	28.026
26250	25.633	30.604			25.366	28.026
26500	28.238	32.669			25.366	28.026
26750	28.408	35.71			25.366	28.026
27000	27.092	32.542			25.366	28.026
27250	28.772	31.15			25.366	28.026
27500	26.689	29.863			25.366	28.026
27750	30.087	30.999			25.366	28.026
28000	32.077	36.955			25.366	28.026
28250	29.675	34.033			25.366	28.026
28500	29.429	32.526			25.366	28.026
28750	30.377	32.153			25.366	28.026
29000	31.418	34.264			25.366	28.026
29250	30.927	36.124			25.366	28.026
29500	28.003	34.661			25.366	28.026
29750	26.065	31.313			25.366	28.026
