# Supplementary material for: Computational development of rubromycin-based lead compounds for HIV-1 reverse transcriptase inhibition
Source: PeerJ. 2014 Jul 10;2:e470. doi: 10.7717/peerj.470 (PMC4103094; doi:10.7717/peerj.470)
Supplement: Supplemental Information 30 [file peerj-02-470-s030.xls]

## Sheet: MD_0_WT_open_v_extended
					D67 Q242	N 255 K 154
15000	33.647	35.967			25.366	28.026
15250	32.172	34.514			25.366	28.026
15500	36.157	36.493			25.366	28.026
15750	34.531	36.706			25.366	28.026
16000	33.442	34.748			25.366	28.026
16250	33.015	36.101			25.366	28.026
16500	30.617	34.344			25.366	28.026
16750	28.673	33.58			25.366	28.026
17000	33.852	35.115			25.366	28.026
17250	30.557	35.343			25.366	28.026
17500	34.071	32.87			25.366	28.026
17750	33.692	31.176			25.366	28.026
18000	32.923	33.043			25.366	28.026
18250	35.125	33.515			25.366	28.026
18500	29.228	33.484			25.366	28.026
18750	28.838	34.619			25.366	28.026
19000	28.611	32.717			25.366	28.026
19250	30.148	31.829			25.366	28.026
19500	32.257	32.51			25.366	28.026
19750	32.104	34.757			25.366	28.026
20000	32.222	35.564			25.366	28.026
20250	36.947	35.678			25.366	28.026
20500	33.401	35.743			25.366	28.026
20750	34.814	34.72			25.366	28.026
21000	35.55	33.904			25.366	28.026
21250	32.249	35.962			25.366	28.026
21500	34.702	32.542			25.366	28.026
21750	34.529	33.264			25.366	28.026
22000	33.013	36.53			25.366	28.026
22250	36.13	36.875			25.366	28.026
22500	36.604	34.379			25.366	28.026
22750	35.43	33.932			25.366	28.026
23000	34.942	33.807			25.366	28.026
23250	34.053	32.026			25.366	28.026
23500	36.233	35.085			25.366	28.026
23750	33.698	33.222			25.366	28.026
24000	33.758	33.234			25.366	28.026
24250	34.386	35.688			25.366	28.026
24500	30.992	34.21			25.366	28.026
24750	30.393	34.16			25.366	28.026
25000	31.17	34.013			25.366	28.026
25250	35.468	33.362			25.366	28.026
25500	37.997	36.135			25.366	28.026
25750	36.465	32.511			25.366	28.026
26000	36.805	32.612			25.366	28.026
26250	34.338	32.061			25.366	28.026
26500	34.048	32.927			25.366	28.026
26750	36.483	35.615			25.366	28.026
27000	34.552	36.56			25.366	28.026
27250	35.346	36.022			25.366	28.026
27500	31.309	35.148			25.366	28.026
27750	32.662	33.925			25.366	28.026
28000	32.829	33.981			25.366	28.026
28250	31.007	36.584			25.366	28.026
28500	31.663	35.73			25.366	28.026
28750	30.979	33.9			25.366	28.026
29000	32.987	33.016			25.366	28.026
29250	29.047	34.34			25.366	28.026
29500	26.497	31.472			25.366	28.026
29750	32.498	33.821			25.366	28.026
