# Supplementary material for: Computational development of rubromycin-based lead compounds for HIV-1 reverse transcriptase inhibition
Source: PeerJ. 2014 Jul 10;2:e470. doi: 10.7717/peerj.470 (PMC4103094; doi:10.7717/peerj.470)
Supplement: Supplemental Information 32 [file peerj-02-470-s032.xls]

## Sheet: MD_0_WT_open_v_extended
					D67 Q242	N 255 K 154
15000	30.119	29.987			25.366	28.026
15250	25.981	29.819			25.366	28.026
15500	29.261	26.403			25.366	28.026
15750	31.029	28.299			25.366	28.026
16000	26.75	29.421			25.366	28.026
16250	29.138	30.846			25.366	28.026
16500	28.472	29.512			25.366	28.026
16750	27.016	28.537			25.366	28.026
17000	25.548	29.314			25.366	28.026
17250	25.327	29.347			25.366	28.026
17500	26.503	32.192			25.366	28.026
17750	32.232	32.119			25.366	28.026
18000	25.778	33.86			25.366	28.026
18250	30.049	32.013			25.366	28.026
18500	32.107	32.54			25.366	28.026
18750	31.655	32.544			25.366	28.026
19000	30.959	33.417			25.366	28.026
19250	29.329	29.26			25.366	28.026
19500	25.745	28.925			25.366	28.026
19750	30.457	31.384			25.366	28.026
20000	29.339	30.522			25.366	28.026
20250	28.161	30.249			25.366	28.026
20500	28.458	31.691			25.366	28.026
20750	29.479	30.28			25.366	28.026
21000	27.113	29.905			25.366	28.026
21250	30.213	29.371			25.366	28.026
21500	30.586	28.413			25.366	28.026
21750	31.152	29.119			25.366	28.026
22000	27.783	28.664			25.366	28.026
22250	26.062	28.146			25.366	28.026
22500	29.607	30.689			25.366	28.026
22750	33.781	31.36			25.366	28.026
23000	33.149	33.725			25.366	28.026
23250	31.746	33.704			25.366	28.026
23500	33.355	30.883			25.366	28.026
23750	32.7	33.663			25.366	28.026
24000	31.637	33.001			25.366	28.026
24250	25.294	32.09			25.366	28.026
24500	25.066	29.176			25.366	28.026
24750	29.885	27.02			25.366	28.026
25000	26.741	29.693			25.366	28.026
25250	25.838	28.905			25.366	28.026
25500	24.659	29.457			25.366	28.026
25750	25.331	30.552			25.366	28.026
26000	27.611	30.214			25.366	28.026
26250	31.694	29.822			25.366	28.026
26500	26.844	32.62			25.366	28.026
26750	29.584	31.639			25.366	28.026
27000	30.476	33.334			25.366	28.026
27250	31.134	30.439			25.366	28.026
27500	30.035	29.386			25.366	28.026
27750	26.903	30.003			25.366	28.026
28000	29.661	31.486			25.366	28.026
28250	29.933	30.231			25.366	28.026
28500	27.627	27.027			25.366	28.026
28750	25.528	28.807			25.366	28.026
29000	25.888	28.428			25.366	28.026
29250	26.129	30.651			25.366	28.026
29500	27.037	28.981			25.366	28.026
29750	24.934	30.257			25.366	28.026
