# Supplementary material for: Computational development of rubromycin-based lead compounds for HIV-1 reverse transcriptase inhibition
Source: PeerJ. 2014 Jul 10;2:e470. doi: 10.7717/peerj.470 (PMC4103094; doi:10.7717/peerj.470)
Supplement: Supplemental Information 33 [file peerj-02-470-s033.xls]

## Sheet: MD_0_WT_open_v_extended
					D67 Q242	N 255 K 154
15000	25.938	28.07			25.366	28.026
15250	29.382	30.776			25.366	28.026
15500	27.765	30.042			25.366	28.026
15750	28.694	32.12			25.366	28.026
16000	29.122	33.447			25.366	28.026
16250	29.112	32.002			25.366	28.026
16500	27.597	30.933			25.366	28.026
16750	22.182	32.162			25.366	28.026
17000	24.013	30.69			25.366	28.026
17250	24.829	34.28			25.366	28.026
17500	26.255	32.99			25.366	28.026
17750	27.544	30.916			25.366	28.026
18000	25.364	31.143			25.366	28.026
18250	25.89	28.069			25.366	28.026
18500	25.71	29.723			25.366	28.026
18750	22.606	29.649			25.366	28.026
19000	24.787	31.325			25.366	28.026
19250	25.651	28.762			25.366	28.026
19500	26.379	28.749			25.366	28.026
19750	26.981	29.122			25.366	28.026
20000	27.57	27.623			25.366	28.026
20250	23.667	29.079			25.366	28.026
20500	21.034	30.814			25.366	28.026
20750	25.897	28.325			25.366	28.026
21000	30.105	27.546			25.366	28.026
21250	30.207	30.631			25.366	28.026
21500	29.581	29.525			25.366	28.026
21750	30.595	30.971			25.366	28.026
22000	25.185	30.589			25.366	28.026
22250	27.302	27.675			25.366	28.026
22500	25.882	27.885			25.366	28.026
22750	24.646	27.132			25.366	28.026
23000	23.988	29.181			25.366	28.026
23250	21.64	27.633			25.366	28.026
23500	25.193	27.813			25.366	28.026
23750	23.31	29.44			25.366	28.026
24000	29.162	31.41			25.366	28.026
24250	22.704	31.819			25.366	28.026
24500	26.91	30.99			25.366	28.026
24750	25.393	27.413			25.366	28.026
25000	25.549	28.275			25.366	28.026
25250	25.091	29.265			25.366	28.026
25500	27.97	31.233			25.366	28.026
25750	27.282	29.397			25.366	28.026
26000	28.958	28.416			25.366	28.026
26250	27.737	29.202			25.366	28.026
26500	25.054	27.69			25.366	28.026
26750	29.077	27.796			25.366	28.026
27000	27.252	29.604			25.366	28.026
27250	31.491	28.739			25.366	28.026
27500	25.004	29.163			25.366	28.026
27750	26.156	28.546			25.366	28.026
28000	26.194	30.264			25.366	28.026
28250	26.53	27.779			25.366	28.026
28500	27.21	27.326			25.366	28.026
28750	26.175	27.944			25.366	28.026
29000	24.804	29.502			25.366	28.026
29250	26.55	33.078			25.366	28.026
29500	29.522	31.206			25.366	28.026
29750	27.179	29.559			25.366	28.026
